# Supplementary material for: A facile synthesis of mesoporous crystalline tin oxide films involving a base-triggered formation of sol–gel building blocks
Source: Royal Society of Chemistry journal article supplement (doi:10.1039/c0nr00872a), 2011-01-01
Supplement: c0nr00872a.pdf [file c0nr00872a.pdf]

## A facile synthesis of mesoporous crystalline tin oxide films involving a base-triggered formation of sol-gel building blocks

Dorothee Irmgard Fried, Alesja Ivanova, Vesna Müller, Jiri Rathousky, Bernd M. Smarsly,  
Dina Fattakhova-Rohlfing

### SUPPORTING INFORMATION

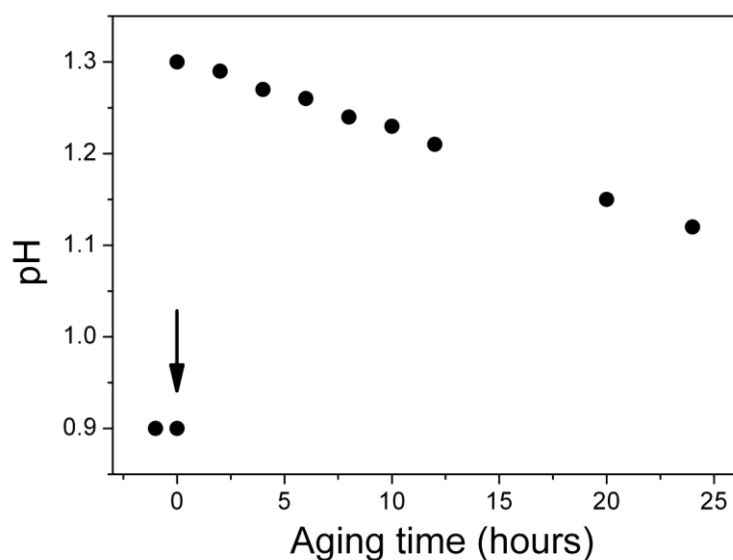

**Figure S1.** Change in pH of solution of SnCl<sub>4</sub> in a 1:1 mixture of EtOH and BuOH (concentration and solution preparation described in the Experimental part) after the addition of NH<sub>4</sub>OH (OH/Sn = 2.6 mol/mol) and aging at room temperature. The arrow indicates the very moment of the NH<sub>4</sub>OH addition.

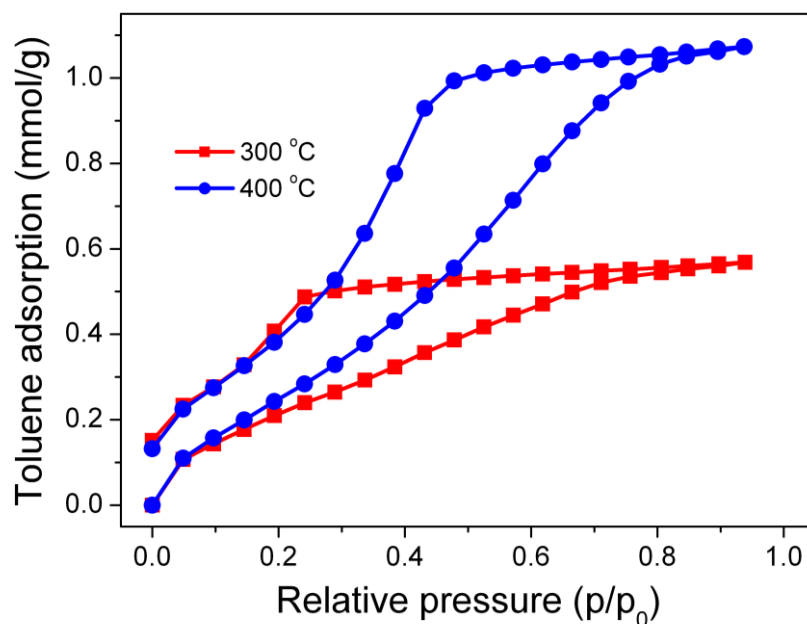

**Figure S2.** Adsorption isotherms of toluene at 298 K on SnO<sub>2</sub> films coated from OH-hydrolyzed solutions (OH/Sn molar ratio of 2.6, aged for one day at room temperature) calcined at 300 °C (red) and 400 °C (blue).

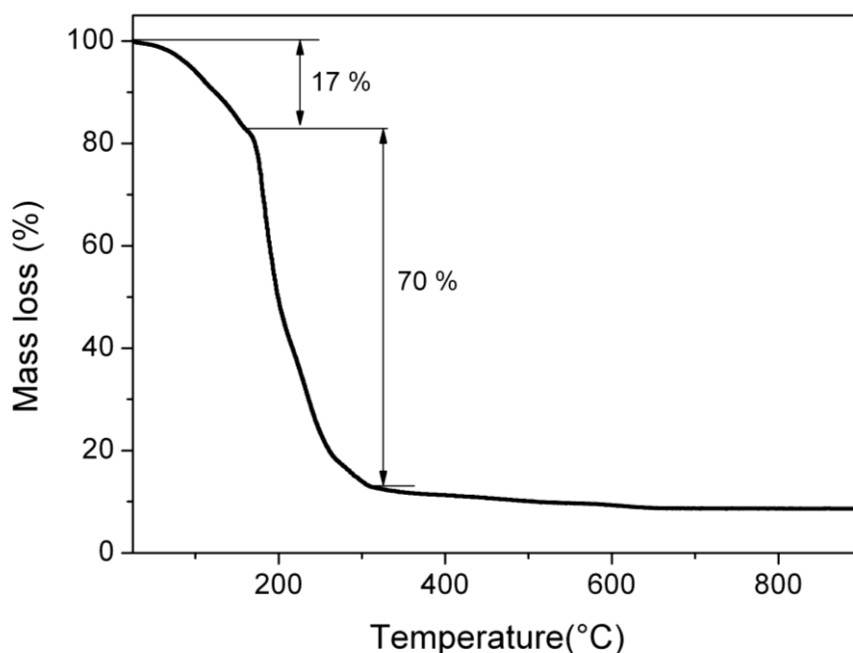

**Figure S3.** Thermogravimetry analysis (TGA) in air of the Pluronic F127-containing coating sol used for fabrication of mesoporous SnO<sub>2</sub> films. The mass loss at 0 – 160 °C and 160 – 300 °C corresponds to the removal of solvents and the combustion of Pluronic F127, respectively.

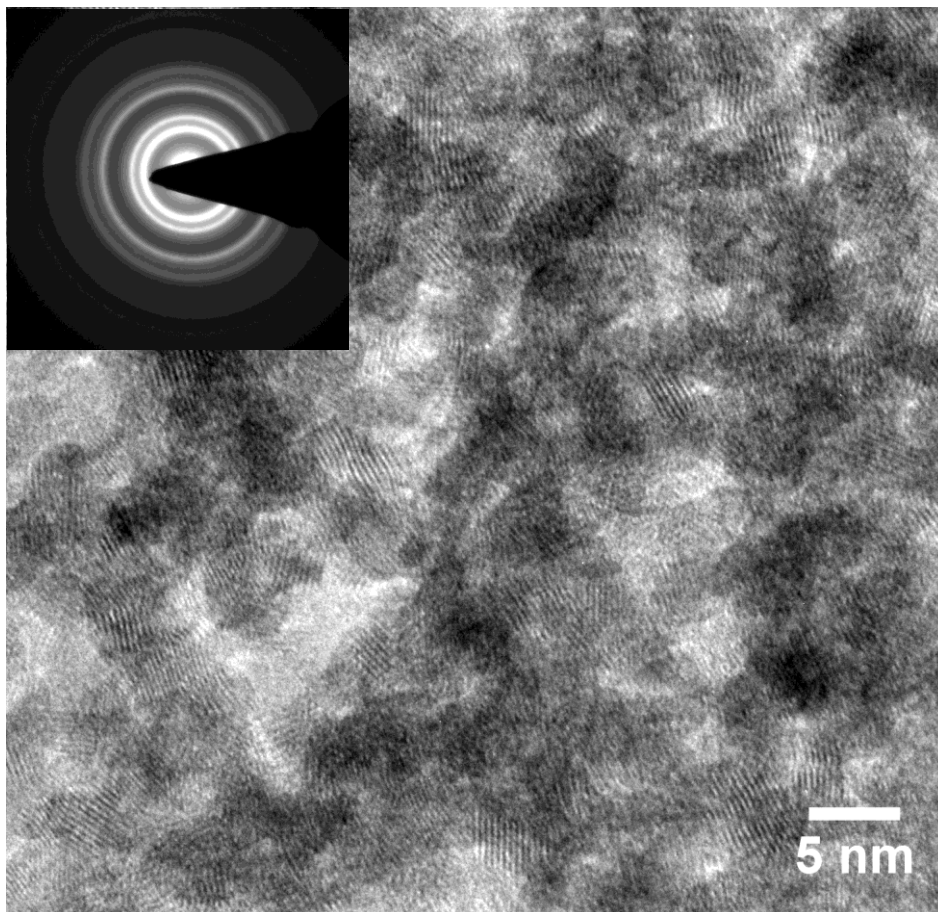

**Figure S4.** HR-TEM image with the corresponding SAED pattern in inset of the mesoporous SnO<sub>2</sub> films prepared from OH-hydrolyzed solution (OH/Sn molar ratio of 2.6, aged for one day at room temperature) calcined at 300 °C.
